# Supplementary material
Source: ML conference proceedings conference paper supplement (https://proceedings.mlr.press/v32/sutton14.html)
Supplement: Supplementary file 1 [file sutton14-supp.pdf]

## Supplementary material

Here we prove the theorems and derive the recursive relationships stated but not proved in the main text. First we prove the recursions in the time horizon  $t$  for the forward-view errors used by PTD( $\lambda$ ) and PQ( $\lambda$ ). We then prove a recursion in  $k$  for PTD (Lemma 1) and use it to prove Theorem 3 for PTD. Next we prove an analogous recursion in  $k$  (Lemma 2) and theorem (Theorem 5) for PQ and for action values. Finally, we provide some further detail on a key step in the derivations of the update of the provisional weights,  $\mathbf{u}_t$ , for both algorithms.

### S.1 Derivation of Equation (11), the PTD recursion in $t$

From (6), for  $k < t$ , we immediately have

$$\begin{aligned}
\delta_{k,t+1}^{\lambda\rho} &= \rho_k \sum_{i=k+1}^t C_k^{i-1} \left[ (1 - \gamma_i) \epsilon_k^i + \gamma_i (1 - \lambda_i) \bar{\delta}_k^i \right] + \rho_k C_k^t \left[ (1 - \gamma_{t+1}) \epsilon_k^{t+1} + \gamma_{t+1} \bar{\delta}_k^{t+1} \right] \\
&= \rho_k \sum_{i=k+1}^{t-1} C_k^{i-1} \left[ (1 - \gamma_i) \epsilon_k^i + \gamma_i (1 - \lambda_i) \bar{\delta}_k^i \right] + \rho_k C_k^{t-1} \left[ (1 - \gamma_t) \epsilon_k^t + \gamma_t (1 - \lambda_t) \bar{\delta}_k^t \right] \\
&\quad + \rho_k C_k^t \left[ (1 - \gamma_{t+1}) \epsilon_k^{t+1} + \gamma_{t+1} \bar{\delta}_k^{t+1} \right] \\
&= \rho_k \underbrace{\sum_{i=k+1}^{t-1} C_k^{i-1} \left[ (1 - \gamma_i) \epsilon_k^i + \gamma_i (1 - \lambda_i) \bar{\delta}_k^i \right]}_{\delta_{k,t}^{\lambda\rho}} + \rho_k C_k^{t-1} \left[ (1 - \gamma_t) \epsilon_k^t + \gamma_t \bar{\delta}_k^t \right] \\
&\quad - \rho_k C_k^{t-1} \gamma_t \lambda_t \bar{\delta}_k^t + \rho_k C_k^t \left[ (1 - \gamma_{t+1}) \epsilon_k^{t+1} + \gamma_{t+1} \bar{\delta}_k^{t+1} \right] \\
&= \delta_{k,t}^{\lambda\rho} - \rho_k C_k^{t-1} \gamma_t \lambda_t \bar{\delta}_k^t + \rho_k C_k^t \left[ (1 - \gamma_{t+1}) \epsilon_k^{t+1} + \gamma_{t+1} \bar{\delta}_k^{t+1} \right]. \tag{28}
\end{aligned}$$

Although this is already a recursion of the desired form, expressing  $\delta_{k,t+1}^{\lambda\rho}$  in terms of  $\delta_{k,t}^{\lambda\rho}$ , we are not done yet. The recursion can be simplified further by noting that

$$\begin{aligned}
(1 - \gamma_{t+1}) \epsilon_k^{t+1} + \gamma_{t+1} \bar{\delta}_k^{t+1} &= (1 - \gamma_{t+1}) \left( \sum_{i=k+1}^{t+1} R_i - \boldsymbol{\theta}^\top \boldsymbol{\phi}_k \right) + \gamma_{t+1} \left( \sum_{i=k+1}^{t+1} R_i + \boldsymbol{\theta}^\top \boldsymbol{\phi}_{t+1} - \boldsymbol{\theta}^\top \boldsymbol{\phi}_k \right) \\
&= \sum_{i=k+1}^{t+1} R_i - \boldsymbol{\theta}^\top \boldsymbol{\phi}_k + \gamma_{t+1} \boldsymbol{\theta}^\top \boldsymbol{\phi}_{t+1} \\
&= \sum_{i=k+1}^t R_i - \boldsymbol{\theta}^\top \boldsymbol{\phi}_k + R_{t+1} + \gamma_{t+1} \boldsymbol{\theta}^\top \boldsymbol{\phi}_{t+1} - \boldsymbol{\theta}^\top \boldsymbol{\phi}_t + \boldsymbol{\theta}^\top \boldsymbol{\phi}_t \\
&= \sum_{i=k+1}^t R_i - \boldsymbol{\theta}^\top \boldsymbol{\phi}_k + \delta_t + \boldsymbol{\theta}^\top \boldsymbol{\phi}_t \\
&= \bar{\delta}_k^t + \delta_t.
\end{aligned}$$

Substituting this in (28), we obtain our final recursion:

$$\begin{aligned}
\delta_{k,t+1}^{\lambda\rho} &= \delta_{k,t}^{\lambda\rho} - \rho_k C_k^{t-1} \gamma_t \lambda_t \bar{\delta}_k^t + \rho_k C_k^t (\bar{\delta}_k^t + \delta_t) \\
&= \delta_{k,t}^{\lambda\rho} - \rho_k C_k^{t-1} \gamma_t \lambda_t \bar{\delta}_k^t + \rho_k C_k^{t-1} \gamma_t \lambda_t \rho_t \bar{\delta}_k^t + \rho_k C_k^t \delta_t \\
&= \delta_{k,t}^{\lambda\rho} + \rho_k C_k^t \delta_t + (\rho_t - 1) \gamma_t \lambda_t \rho_k C_k^{t-1} \bar{\delta}_k^t. \tag{11}
\end{aligned}$$

## S.2 Derivation of Equation (24), the PQ recursion in $t$

The first steps of this derivation are directly analogous to those in the previous section leading to (28), except here using the definitions for the action-value case in Section 5. We do not repeat these steps here. In this case they lead to

$$\delta_{k,t+1}^{\lambda\rho} = \delta_{k,t}^{\lambda\rho} - C_k^{t-1} \gamma_t \lambda_t \bar{\delta}_k^t + C_k^t \left[ (1 - \gamma_{t+1}) \epsilon_k^{t+1} + \gamma_{t+1} \bar{\delta}_k^{t+1} \right], \quad (29)$$

for all  $k < t$ . Note that, compared to (28),  $\rho_k$  is absent.

Again, this recursion can be simplified. Using (20–22) we get

$$\begin{aligned} (1 - \gamma_{t+1}) \epsilon_k^{t+1} + \gamma_{t+1} \bar{\delta}_k^{t+1} &= (1 - \gamma_{t+1}) \left( \sum_{i=k+1}^{t+1} R_i - \boldsymbol{\theta}^\top \boldsymbol{\phi}_k \right) + \gamma_{t+1} \left( \sum_{i=k+1}^{t+1} R_i + \boldsymbol{\theta}^\top \bar{\boldsymbol{\phi}}_{t+1}^\pi - \boldsymbol{\theta}^\top \boldsymbol{\phi}_k \right) \\ &= \sum_{i=k+1}^{t+1} R_i - \boldsymbol{\theta}^\top \boldsymbol{\phi}_k + \gamma_{t+1} \boldsymbol{\theta}^\top \bar{\boldsymbol{\phi}}_{t+1}^\pi \\ &= \sum_{i=k+1}^t R_i - \boldsymbol{\theta}^\top \boldsymbol{\phi}_k + R_{t+1} + \gamma_{t+1} \boldsymbol{\theta}^\top \bar{\boldsymbol{\phi}}_{t+1}^\pi - \boldsymbol{\theta}^\top \boldsymbol{\phi}_t + \boldsymbol{\theta}^\top \boldsymbol{\phi}_t \\ &= \epsilon_k^t + \delta_t + \boldsymbol{\theta}^\top \boldsymbol{\phi}_t \\ &= \bar{\delta}_k^t - \boldsymbol{\theta}^\top \bar{\boldsymbol{\phi}}_t^\pi + \delta_t + \boldsymbol{\theta}^\top \boldsymbol{\phi}_t \\ &= \bar{\delta}_k^t + \delta_t + \boldsymbol{\theta}^\top (\boldsymbol{\phi}_t - \bar{\boldsymbol{\phi}}_t^\pi). \end{aligned}$$

Using this in (29), we obtain our final recursion:

$$\begin{aligned} \delta_{k,t+1}^{\lambda\rho} &= \delta_{k,t}^{\lambda\rho} - C_k^{t-1} \gamma_t \lambda_t \bar{\delta}_k^t + C_k^t (\bar{\delta}_k^t + \delta_t + \boldsymbol{\theta}^\top (\boldsymbol{\phi}_t - \bar{\boldsymbol{\phi}}_t^\pi)) \\ &= \delta_{k,t}^{\lambda\rho} - C_k^{t-1} \gamma_t \lambda_t \bar{\delta}_k^t + C_k^{t-1} \gamma_t \lambda_t \rho_t \bar{\delta}_k^t + C_k^t \delta_t + C_k^t \boldsymbol{\theta}^\top (\boldsymbol{\phi}_t - \bar{\boldsymbol{\phi}}_t^\pi) \\ &= \delta_{k,t}^{\lambda\rho} + C_k^t \delta_t + C_k^t \boldsymbol{\theta}^\top (\boldsymbol{\phi}_t - \bar{\boldsymbol{\phi}}_t^\pi) + (\rho_t - 1) \gamma_t \lambda_t C_k^{t-1} \bar{\delta}_k^t. \end{aligned} \quad (24)$$

## S.3 Lemma 1: PTD recursion in $k$

The following lemma, used in proving Theorem 3 in the next section, shows how  $\delta_{k,t}^{\lambda\rho}$  depends on  $\delta_{k+1,t}^{\lambda\rho}$ . All definitions are from Sections 2–4 (the state-value or PTD case).

**Lemma 1** (PTD error recursion in  $k$ ). *For all  $k < t - 1$ ,*

$$\delta_{k,t}^{\lambda\rho} = \rho_k \left( \delta_k + (D_k^t - 1) \bar{\delta}_k^{k+1} + \gamma_{k+1} \lambda_{k+1} \delta_{k+1,t}^{\lambda\rho} \right), \quad (30)$$

where

$$D_k^t = \sum_{i=k+1}^{t-1} C_k^{i-1} (1 - \gamma_i \lambda_i) + C_k^{t-1}. \quad (31)$$

*Proof.* First note that from definitions (3) and (4) it is clear that

$$\bar{\delta}_k^i = \epsilon_k^i + \boldsymbol{\theta}^\top \boldsymbol{\phi}_i \quad (32)$$

and

$$\begin{aligned} \epsilon_k^i &= R_{k+1} + R_{k+2} + \cdots + R_i - \boldsymbol{\theta}^\top \boldsymbol{\phi}_k \\ &= R_{k+1} + R_{k+2} + \cdots + R_i - \boldsymbol{\theta}^\top \boldsymbol{\phi}_{k+1} + \boldsymbol{\theta}^\top \boldsymbol{\phi}_{k+1} - \boldsymbol{\theta}^\top \boldsymbol{\phi}_k \\ &= R_{k+1} + \epsilon_{k+1}^i + \boldsymbol{\theta}^\top \boldsymbol{\phi}_{k+1} - \boldsymbol{\theta}^\top \boldsymbol{\phi}_k \\ &= \bar{\delta}_k^{k+1} + \epsilon_{k+1}^i. \end{aligned} \quad (33)$$

Using these, the lemma can be directly derived:

$$\begin{aligned} \delta_{k,t}^{\lambda\rho} &= \rho_k \left( \sum_{i=k+1}^{t-1} C_k^{i-1} \left[ (1 - \gamma_i) \epsilon_k^i + \gamma_i (1 - \lambda_i) \bar{\delta}_k^i \right] + C_k^{t-1} \left[ (1 - \gamma_t) \epsilon_k^t + \gamma_t \bar{\delta}_k^t \right] \right) \quad (\text{as in (6)}) \\ &= \rho_k \left( \sum_{i=k+1}^{t-1} C_k^{i-1} \left[ (1 - \gamma_i) \epsilon_k^i + \gamma_i (1 - \lambda_i) (\epsilon_k^i + \boldsymbol{\theta}^\top \boldsymbol{\phi}_i) \right] + C_k^{t-1} \left[ (1 - \gamma_t) \epsilon_k^t + \gamma_t (\epsilon_k^t + \boldsymbol{\theta}^\top \boldsymbol{\phi}_t) \right] \right) \quad (\text{using (32)}) \\ &= \rho_k \left( \sum_{i=k+1}^{t-1} C_k^{i-1} \left[ (1 - \gamma_i \lambda_i) \epsilon_k^i + \gamma_i (1 - \lambda_i) \boldsymbol{\theta}^\top \boldsymbol{\phi}_i \right] + C_k^{t-1} \left[ \epsilon_k^t + \gamma_t \boldsymbol{\theta}^\top \boldsymbol{\phi}_t \right] \right) \quad (34) \\ &= \rho_k \left( \sum_{i=k+2}^{t-1} C_k^{i-1} \left[ (1 - \gamma_i \lambda_i) \epsilon_k^i + \gamma_i (1 - \lambda_i) \boldsymbol{\theta}^\top \boldsymbol{\phi}_i \right] + C_k^{t-1} \left[ \epsilon_k^t + \gamma_t \boldsymbol{\theta}^\top \boldsymbol{\phi}_t \right] \right. \\ &\quad \left. + C_k^k \left[ (1 - \gamma_{k+1} \lambda_{k+1}) \epsilon_k^{k+1} + \gamma_{k+1} (1 - \lambda_{k+1}) \boldsymbol{\theta}^\top \boldsymbol{\phi}_{k+1} \right] \right) \\ &= \rho_k \left( \sum_{i=k+2}^{t-1} C_k^{i-1} \left[ (1 - \gamma_i \lambda_i) (\bar{\delta}_k^{k+1} + \epsilon_{k+1}^i) + \gamma_i (1 - \lambda_i) \boldsymbol{\theta}^\top \boldsymbol{\phi}_i \right] + C_k^{t-1} \left[ \bar{\delta}_k^{k+1} + \epsilon_{k+1}^t + \gamma_t \boldsymbol{\theta}^\top \boldsymbol{\phi}_t \right] \right) \quad (\text{using (33)}) \\ &\quad \left. + (1 - \gamma_{k+1} \lambda_{k+1}) (R_{k+1} - \boldsymbol{\theta}^\top \boldsymbol{\phi}_k) + \gamma_{k+1} (1 - \lambda_{k+1}) \boldsymbol{\theta}^\top \boldsymbol{\phi}_{k+1} \right) \quad (\text{using } C_k^k = 1) \\ &= \rho_k \left( \sum_{i=k+2}^{t-1} C_k^{i-1} \left[ (1 - \gamma_i \lambda_i) \epsilon_{k+1}^i + \gamma_i (1 - \lambda_i) \boldsymbol{\theta}^\top \boldsymbol{\phi}_i \right] + C_k^{t-1} \left[ \epsilon_{k+1}^t + \gamma_t \boldsymbol{\theta}^\top \boldsymbol{\phi}_t \right] + \sum_{i=k+2}^{t-1} C_k^{i-1} (1 - \gamma_i \lambda_i) \bar{\delta}_k^{k+1} + C_k^{t-1} \bar{\delta}_k^{k+1} \right. \\ &\quad \left. + R_{k+1} - \boldsymbol{\theta}^\top \boldsymbol{\phi}_k + \gamma_{k+1} \boldsymbol{\theta}^\top \boldsymbol{\phi}_{k+1} - \gamma_{k+1} \lambda_{k+1} (R_{k+1} - \boldsymbol{\theta}^\top \boldsymbol{\phi}_k + \boldsymbol{\theta}^\top \boldsymbol{\phi}_{k+1}) \right) \\ &= \rho_k \left( \sum_{i=k+2}^{t-1} \gamma_{k+1} \lambda_{k+1} \rho_{k+1} C_{k+1}^{i-1} \left[ (1 - \gamma_i \lambda_i) \epsilon_{k+1}^i + \gamma_i (1 - \lambda_i) \boldsymbol{\theta}^\top \boldsymbol{\phi}_i \right] + \gamma_{k+1} \lambda_{k+1} \rho_{k+1} C_{k+1}^{t-1} \left[ \epsilon_{k+1}^t + \gamma_t \boldsymbol{\theta}^\top \boldsymbol{\phi}_t \right] \right. \\ &\quad \left. + \sum_{i=k+2}^{t-1} C_k^{i-1} (1 - \gamma_i \lambda_i) \bar{\delta}_k^{k+1} + C_k^{t-1} \bar{\delta}_k^{k+1} + \delta_k - \gamma_{k+1} \lambda_{k+1} \bar{\delta}_k^{k+1} \right) \\ &= \rho_k \left( \gamma_{k+1} \lambda_{k+1} \delta_{k+1,t}^{\lambda\rho} + \left[ \sum_{i=k+2}^{t-1} C_k^{i-1} (1 - \gamma_i \lambda_i) + 1 - \gamma_{k+1} \lambda_{k+1} + C_k^{t-1} - 1 \right] \bar{\delta}_k^{k+1} + \delta_k \right) \quad (\text{using (34)}) \\ &= \rho_k \left( \gamma_{k+1} \lambda_{k+1} \delta_{k+1,t}^{\lambda\rho} + \left[ \sum_{i=k+2}^{t-1} C_k^{i-1} (1 - \gamma_i \lambda_i) + C_k^k (1 - \gamma_{k+1} \lambda_{k+1}) + C_k^{t-1} - 1 \right] \bar{\delta}_k^{k+1} + \delta_k \right) \\ &= \rho_k \left( \gamma_{k+1} \lambda_{k+1} \delta_{k+1,t}^{\lambda\rho} + \left[ \sum_{i=k+1}^{t-1} C_k^{i-1} (1 - \gamma_i \lambda_i) + C_k^{t-1} - 1 \right] \bar{\delta}_k^{k+1} + \delta_k \right) \\ &= \rho_k \left( \delta_k + [D_k^t - 1] \bar{\delta}_k^{k+1} + \gamma_{k+1} \lambda_{k+1} \delta_{k+1,t}^{\lambda\rho} \right). \quad \square \end{aligned}$$

### S.4 Proof of Theorem 3 (On-policy and off-policy expectations for PTD)

All definitions here are from Sections 2-4 (the state-value or PTD case).

**Theorem 3** (On-policy and off-policy expectations). *For any state  $s$ ,*

$$\mathbb{E}_b \left[ \delta_{k,t}^{\lambda\rho} \middle| S_k = s \right] = \mathbb{E}_\pi \left[ \delta_{k,t}^{\lambda 1} \middle| S_k = s \right], \quad (35)$$

where  $\mathbb{E}_b$  and  $\mathbb{E}_\pi$  denote expectations under the behavior and target policies, and  $\delta_{k,t}^{\lambda 1}$  denotes  $\delta_{k,t}^{\lambda\rho}$  with  $\rho_t = 1$  for all  $t$ .

*Proof.* First we note that

$$\begin{aligned} \mathbb{E}_b \left[ \rho_k C_k^t \middle| S_k = s \right] &= \mathbb{E}_b \left[ \rho_k \prod_{i=k+1}^t \gamma_i \lambda_i \rho_i \middle| S_k = s \right] \\ &= \sum_a b(a|s) \sum_{s'} p(s'|s, a) \frac{\pi(a|s)}{b(a|s)} \gamma(s') \lambda(s') \mathbb{E}_b \left[ \prod_{i=k+2}^t \gamma_i \lambda_i \rho_i \middle| S_k = s, A_k = a, S_{k+1} = s' \right] \\ &= \sum_a \pi(a|s) \sum_{s'} p(s'|s, a) \gamma(s') \lambda(s') \mathbb{E}_b \left[ \rho_{k+1} \prod_{i=k+2}^t \gamma_i \lambda_i \rho_i \middle| S_{k+1} = s' \right] \\ &= \sum_a \pi(a|s) \sum_{s'} p(s'|s, a) \gamma(s') \lambda(s') \sum_{a'} \pi(a'|s') \sum_{s''} p(s''|s', a') \gamma(s'') \lambda(s'') \cdots \\ &= \mathbb{E}_\pi \left[ \prod_{i=k+1}^t \gamma_i \lambda_i \middle| S_k = s \right], \end{aligned}$$

from which one can show

$$\begin{aligned} \mathbb{E}_b \left[ \rho_k D_k^t \middle| S_k = s \right] &= \mathbb{E}_b \left[ \rho_k \left( \sum_{i=k+1}^{t-1} C_k^{i-1} (1 - \gamma_i \lambda_i) + C_k^{t-1} \right) \middle| S_k = s \right] \quad (\text{using (31)}) \\ &= \mathbb{E}_\pi \left[ \sum_{i=k+1}^{t-1} \prod_{j=k+1}^i \gamma_j \lambda_j (1 - \gamma_j \lambda_j) + \prod_{i=k+1}^t \gamma_i \lambda_i \middle| S_k = s \right] \\ &= 1. \quad (36) \end{aligned}$$

Now we can start directly from the left-hand side of the theorem statement:

$$\begin{aligned} \mathbb{E}_b \left[ \delta_{k,t}^{\lambda\rho} \middle| S_k = s \right] &= \mathbb{E}_b \left[ \rho_k \left( \delta_k + (D_k^t - 1) \bar{\delta}_k^{k+1} + \gamma_{k+1} \lambda_{k+1} \delta_{k+1,t}^{\lambda\rho} \right) \middle| S_k = s \right] \quad (\text{using Lemma 1}) \\ &= \mathbb{E}_b \left[ \rho_k \left( \delta_k + \gamma_{k+1} \lambda_{k+1} \delta_{k+1,t}^{\lambda\rho} \right) \middle| S_k = s \right] \quad (\text{using (36)}) \\ &= \sum_a b(a|s) \frac{\pi(a|s)}{b(a|s)} \left( \mathbb{E}_b \left[ \delta_k \middle| S_k = s, A_k = a \right] + \mathbb{E}_b \left[ \gamma_{k+1} \lambda_{k+1} \delta_{k+1,t}^{\lambda\rho} \middle| S_k = s, A_k = a \right] \right) \\ &= \sum_a \pi(a|s) \left( \mathbb{E}_b \left[ \delta_k \middle| S_k = s, A_k = a \right] + \mathbb{E}_b \left[ \gamma_{k+1} \lambda_{k+1} \delta_{k+1,t}^{\lambda\rho} \middle| S_k = s, A_k = a \right] \right) \\ &= \mathbb{E}_\pi \left[ \delta_k \middle| S_k = s \right] + \sum_a \pi(a|s) \sum_{s'} p(s'|s, a) \gamma(s') \lambda(s') \mathbb{E}_b \left[ \delta_{k+1,t}^{\lambda\rho} \middle| S_{k+1} = s' \right] \\ &= \mathbb{E}_\pi \left[ \delta_k + \gamma_{k+1} \lambda_{k+1} \mathbb{E}_b \left[ \delta_{k+1,t}^{\lambda\rho} \middle| S_{k+1} \right] \middle| S_k = s \right] \\ &= \mathbb{E}_\pi \left[ \delta_k + \gamma_{k+1} \lambda_{k+1} \delta_{k+1} + \gamma_{k+2} \lambda_{k+2} \mathbb{E}_b \left[ \delta_{k+2,t}^{\lambda\rho} \middle| S_{k+2} \right] \middle| S_k = s \right] \\ &\vdots \end{aligned}$$

$$= \mathbb{E}_\pi \left[ \sum_{j=k}^{t-1} \left( \prod_{i=k+1}^j \gamma_i \lambda_i \right) \delta_j \middle| S_k = s \right].$$

It thus only remains to show that  $\delta_{k,t}^{\lambda 1}$  is equal to this sum, which we can show directly from (11) and the definition of  $\delta_{k,t}^{\lambda 1}$ :

$$\begin{aligned} \delta_{k,t}^{\lambda 1} &= \delta_{k,t-1}^{\lambda 1} + \left( \prod_{i=k+1}^{t-1} \gamma_i \lambda_i \right) \delta_{t-1} \\ &= \delta_{k,t-2}^{\lambda 1} + \left( \prod_{i=k+1}^{t-2} \gamma_i \lambda_i \right) \delta_{t-2} + \left( \prod_{i=k+1}^{t-1} \gamma_i \lambda_i \right) \delta_{t-1} \\ &\quad \vdots \\ &= \sum_{j=k}^{t-1} \left( \prod_{i=k+1}^j \gamma_i \lambda_i \right) \delta_j. \end{aligned}$$

□

### S.5 Lemma 2: PQ recursion in $k$

This lemma is the analog of Lemma 1 for the action-value case, showing how  $\delta_{k,t}^{\lambda \rho}$  depends on  $\delta_{k+1,t}^{\lambda \rho}$  when these errors are defined by (18–24). This lemma assists in proving Theorem 5 below. All definitions here are as in Section 5 (the action-value or PQ case), plus  $D_k^t$  as in Lemma 1.

**Lemma 2** (PQ error recursion in  $k$ ). *For all  $k < t - 1$ ,*

$$\delta_{k,t}^{\lambda \rho} = \delta_k + \gamma_{k+1} \lambda_{k+1} \rho_{k+1} \delta_{k+1,t}^{\lambda \rho} + \gamma_{k+1} \lambda_{k+1} \boldsymbol{\theta}^\top (\boldsymbol{\phi}_{k+1} - \bar{\boldsymbol{\phi}}_{k+1}^\pi) + (D_k^t - 1) (\epsilon_k^{k+1} + \boldsymbol{\theta}^\top \boldsymbol{\phi}_{k+1}). \quad (37)$$

*Proof.* The proof is analogous to that of Lemma 1. Here we have the helper identities

$$\bar{\delta}_k^i = \epsilon_k^i + \boldsymbol{\theta}^\top \bar{\boldsymbol{\phi}}_i^\pi, \quad (38)$$

and

$$\epsilon_k^i = \epsilon_{k+1}^i + \epsilon_k^{k+1} + \boldsymbol{\theta}^\top \boldsymbol{\phi}_{k+1}. \quad (39)$$

Then we can proceed directly:

$$\begin{aligned} \delta_{k,t}^{\lambda \rho} &= \sum_{i=k+1}^{t-1} C_k^{i-1} \left[ (1 - \gamma_i) \epsilon_k^i + \gamma_i (1 - \lambda_i) \bar{\delta}_k^i \right] + C_k^{t-1} \left[ (1 - \gamma_t) \epsilon_k^t + \gamma_t \bar{\delta}_k^t \right] && \text{(as in (23))} \\ &= \sum_{i=k+1}^{t-1} C_k^{i-1} \left[ (1 - \gamma_i) \epsilon_k^i + \gamma_i (1 - \lambda_i) (\epsilon_k^i + \boldsymbol{\theta}^\top \bar{\boldsymbol{\phi}}_i^\pi) \right] + C_k^{t-1} \left[ (1 - \gamma_t) \epsilon_k^t + \gamma_t (\epsilon_k^t + \boldsymbol{\theta}^\top \bar{\boldsymbol{\phi}}_t^\pi) \right] && \text{(using (38))} \\ &= \sum_{i=k+1}^{t-1} C_k^{i-1} \left[ (1 - \gamma_i \lambda_i) \epsilon_k^i + \gamma_i (1 - \lambda_i) \boldsymbol{\theta}^\top \bar{\boldsymbol{\phi}}_i^\pi \right] + C_k^{t-1} \left[ \epsilon_k^t + \gamma_t \boldsymbol{\theta}^\top \bar{\boldsymbol{\phi}}_t^\pi \right] && (40) \\ &= \sum_{i=k+2}^{t-1} C_k^{i-1} \left[ (1 - \gamma_i \lambda_i) \epsilon_k^i + \gamma_i (1 - \lambda_i) \boldsymbol{\theta}^\top \bar{\boldsymbol{\phi}}_i^\pi \right] + C_k^{t-1} \left[ \epsilon_k^t + \gamma_t \boldsymbol{\theta}^\top \bar{\boldsymbol{\phi}}_t^\pi \right] \\ &\quad + C_k^k \left[ (1 - \gamma_{k+1} \lambda_{k+1}) \epsilon_k^{k+1} + \gamma_{k+1} (1 - \lambda_{k+1}) \boldsymbol{\theta}^\top \bar{\boldsymbol{\phi}}_{k+1}^\pi \right] \\ &= \sum_{i=k+2}^{t-1} C_k^{i-1} \left[ (1 - \gamma_i \lambda_i) (\epsilon_{k+1}^i + \epsilon_k^{k+1} + \boldsymbol{\theta}^\top \boldsymbol{\phi}_{k+1}) + \gamma_i (1 - \lambda_i) \boldsymbol{\theta}^\top \bar{\boldsymbol{\phi}}_i^\pi \right] + C_k^{t-1} \left[ \epsilon_{k+1}^t + \epsilon_k^{k+1} + \boldsymbol{\theta}^\top \boldsymbol{\phi}_{k+1} + \gamma_t \boldsymbol{\theta}^\top \bar{\boldsymbol{\phi}}_t^\pi \right] \\ &\quad + (1 - \gamma_{k+1} \lambda_{k+1}) (R_{k+1} - \boldsymbol{\theta}^\top \boldsymbol{\phi}_k) + \gamma_{k+1} (1 - \lambda_{k+1}) \boldsymbol{\theta}^\top \bar{\boldsymbol{\phi}}_{k+1}^\pi && \text{(using (39) and } C_k^k = 1) \end{aligned}$$

$$\begin{aligned}
 &= \sum_{i=k+2}^{t-1} C_k^{i-1} \left[ (1 - \gamma_i \lambda_i) \epsilon_{k+1}^i + \gamma_i (1 - \lambda_i) \boldsymbol{\theta}^\top \bar{\boldsymbol{\phi}}_i^\pi \right] + C_k^{t-1} \left[ \epsilon_{k+1}^t + \gamma_t \boldsymbol{\theta}^\top \bar{\boldsymbol{\phi}}_t^\pi \right] \\
 &\quad + \sum_{i=k+2}^{t-1} C_k^{i-1} \left[ (1 - \gamma_i \lambda_i) (\epsilon_k^{k+1} + \boldsymbol{\theta}^\top \boldsymbol{\phi}_{k+1}) \right] + C_k^{t-1} \left[ \epsilon_k^{k+1} + \boldsymbol{\theta}^\top \boldsymbol{\phi}_{k+1} \right] \\
 &\quad + R_{k+1} - \boldsymbol{\theta}^\top \boldsymbol{\phi}_k + \gamma_{k+1} \boldsymbol{\theta}^\top \bar{\boldsymbol{\phi}}_{k+1}^\pi - \gamma_{k+1} \lambda_{k+1} (R_{k+1} - \boldsymbol{\theta}^\top \boldsymbol{\phi}_k + \boldsymbol{\theta}^\top \bar{\boldsymbol{\phi}}_{k+1}^\pi) \\
 &= \sum_{i=k+2}^{t-1} \gamma_{k+1} \lambda_{k+1} \rho_{k+1} C_{k+1}^{i-1} \left[ (1 - \gamma_i \lambda_i) \epsilon_{k+1}^i + \gamma_i (1 - \lambda_i) \boldsymbol{\theta}^\top \bar{\boldsymbol{\phi}}_i^\pi \right] + \gamma_{k+1} \lambda_{k+1} \rho_{k+1} C_{k+1}^{t-1} \left[ \epsilon_{k+1}^t + \gamma_t \boldsymbol{\theta}^\top \bar{\boldsymbol{\phi}}_t^\pi \right] \\
 &\quad + \sum_{i=k+2}^{t-1} C_k^{i-1} \left[ (1 - \gamma_i \lambda_i) (\epsilon_k^{k+1} + \boldsymbol{\theta}^\top \boldsymbol{\phi}_{k+1}) \right] + C_k^{t-1} \left[ \epsilon_k^{k+1} + \boldsymbol{\theta}^\top \boldsymbol{\phi}_{k+1} \right] + \delta_k - \gamma_{k+1} \lambda_{k+1} \bar{\delta}_k^{k+1} \\
 &= \gamma_{k+1} \lambda_{k+1} \rho_{k+1} \delta_{k+1,t}^{\lambda\rho} + \left( \sum_{i=k+2}^{t-1} C_k^{i-1} (1 - \gamma_i \lambda_i) + C_k^{t-1} \right) (\epsilon_k^{k+1} + \boldsymbol{\theta}^\top \boldsymbol{\phi}_{k+1}) + \delta_k - \gamma_{k+1} \lambda_{k+1} \bar{\delta}_k^{k+1} \\
 &\quad \text{(using (40); now add and subtract } (1 - \gamma_{k+1} \lambda_{k+1}) (\epsilon_k^{k+1} + \boldsymbol{\theta}^\top \boldsymbol{\phi}_{k+1}), \text{ the first element of the summation)} \\
 &= \gamma_{k+1} \lambda_{k+1} \rho_{k+1} \delta_{k+1,t}^{\lambda\rho} + \left( \sum_{i=k+2}^{t-1} C_k^{i-1} (1 - \gamma_i \lambda_i) + C_k^{t-1} - 1 + \gamma_{k+1} \lambda_{k+1} \right) (\epsilon_k^{k+1} + \boldsymbol{\theta}^\top \boldsymbol{\phi}_{k+1}) + \delta_k - \gamma_{k+1} \lambda_{k+1} \bar{\delta}_k^{k+1} \\
 &= \gamma_{k+1} \lambda_{k+1} \rho_{k+1} \delta_{k+1,t}^{\lambda\rho} + (D_k^t - 1 + \gamma_{k+1} \lambda_{k+1}) (\epsilon_k^{k+1} + \boldsymbol{\theta}^\top \boldsymbol{\phi}_{k+1}) + \delta_k - \gamma_{k+1} \lambda_{k+1} \bar{\delta}_k^{k+1} \\
 &= \delta_k + \gamma_{k+1} \lambda_{k+1} \rho_{k+1} \delta_{k+1,t}^{\lambda\rho} + \gamma_{k+1} \lambda_{k+1} (\epsilon_k^{k+1} + \boldsymbol{\theta}^\top \boldsymbol{\phi}_{k+1} - \bar{\delta}_k^{k+1}) + (D_k^t - 1) (\epsilon_k^{k+1} + \boldsymbol{\theta}^\top \boldsymbol{\phi}_{k+1}) \\
 &= \delta_k + \gamma_{k+1} \lambda_{k+1} \rho_{k+1} \delta_{k+1,t}^{\lambda\rho} + \gamma_{k+1} \lambda_{k+1} \boldsymbol{\theta}^\top (\boldsymbol{\phi}_{k+1} - \bar{\boldsymbol{\phi}}_{k+1}^\pi) + (D_k^t - 1) (\epsilon_k^{k+1} + \boldsymbol{\theta}^\top \boldsymbol{\phi}_{k+1}) . \quad \text{(using (38))}
 \end{aligned}$$

□

## S.6 Theorem 5: On-policy and off-policy expectations for PQ

All definitions here are from Section 5 (the state-value or PQ case), plus  $D_k^t$  from Lemma 1.

**Theorem 5** (On-policy and off-policy expectations). *For any state  $s$ ,*

$$\mathbb{E}_b \left[ \delta_{k,t}^{\lambda\rho} \middle| S_k = s, A_k = a \right] = \mathbb{E}_\pi \left[ \delta_{k,t}^{\lambda 1} \middle| S_k = s, A_k = a \right],$$

where  $\mathbb{E}_b$  and  $\mathbb{E}_\pi$  denote expectations under the behavior and target policies, and  $\delta_{k,t}^{\lambda 1}$  denotes  $\delta_{k,t}^{\lambda\rho}$  with  $\rho_t = 1$  for all  $t$ .

*Proof.* The proof is analogous to that for Theorem 3. Using Lemma 2, the left-hand side can be written

$$\begin{aligned}
 &\mathbb{E}_b \left[ \delta_{k,t}^{\lambda\rho} \middle| S_k = s, A_k = a \right] \\
 &= \mathbb{E}_b \left[ \delta_k + \gamma_{k+1} \lambda_{k+1} \rho_{k+1} \delta_{k+1,t}^{\lambda\rho} + \gamma_{k+1} \lambda_{k+1} \boldsymbol{\theta}^\top (\boldsymbol{\phi}_{k+1} - \bar{\boldsymbol{\phi}}_{k+1}^\pi) + (D_k^t - 1) (\epsilon_k^{k+1} + \boldsymbol{\theta}^\top \boldsymbol{\phi}_{k+1}) \middle| S_k = s, A_k = a \right] \\
 &= \mathbb{E}_b \left[ \delta_k + \gamma_{k+1} \lambda_{k+1} \rho_{k+1} \delta_{k+1,t}^{\lambda\rho} + \gamma_{k+1} \lambda_{k+1} \boldsymbol{\theta}^\top (\boldsymbol{\phi}_{k+1} - \bar{\boldsymbol{\phi}}_{k+1}^\pi) \middle| S_k = s, A_k = a \right]
 \end{aligned}$$

(using  $\mathbb{E}_b[X|S_k = s, A_k = a] = \mathbb{E}_\pi[\mathbb{E}_b[X|S_{k+1}]|S_k = s, A_k = a]$ )

$$= \mathbb{E}_\pi \left[ \mathbb{E}_b \left[ \delta_k + \gamma_{k+1} \lambda_{k+1} \rho_{k+1} \delta_{k+1,t}^{\lambda\rho} + \gamma_{k+1} \lambda_{k+1} \boldsymbol{\theta}^\top (\boldsymbol{\phi}_{k+1} - \bar{\boldsymbol{\phi}}_{k+1}^\pi) \middle| S_{k+1} \right] \middle| S_k = s, A_k = a \right]$$

(using  $\mathbb{E}_\pi[\mathbb{E}_b[X|S_{k+1}]|S_k = s, A_k = a] = \mathbb{E}_\pi[X|S_k = s, A_k = a]$  for all  $X$  not depending on  $A_{k+1}$ )

$$= \mathbb{E}_\pi \left[ \delta_k + \gamma_{k+1} \lambda_{k+1} \mathbb{E}_b \left[ \rho_{k+1} \delta_{k+1,t}^{\lambda\rho} \middle| S_{k+1} \right] + \gamma_{k+1} \lambda_{k+1} \boldsymbol{\theta}^\top (\boldsymbol{\phi}_{k+1} - \bar{\boldsymbol{\phi}}_{k+1}^\pi) \middle| S_k = s, A_k = a \right]$$

(using, as in Theorem 3,  $\mathbb{E}_b[\rho_k X|S_k = s] = \mathbb{E}_\pi[\mathbb{E}_b[X|A_k = a]|S_k = s]$ )

$$= \mathbb{E}_\pi \left[ \delta_k + \gamma_{k+1} \lambda_{k+1} \mathbb{E}_\pi \left[ \delta_{k+1,t}^{\lambda\rho} \middle| S_{k+1}, A_{k+1} \right] + \gamma_{k+1} \lambda_{k+1} \boldsymbol{\theta}^\top (\boldsymbol{\phi}_{k+1} - \bar{\boldsymbol{\phi}}_{k+1}^\pi) \middle| S_k = s, A_k = a \right]$$

$$\begin{aligned} & \vdots \quad (\text{repeatedly expand the } \delta^{\lambda\rho} \text{ term until, finally, } \delta_{t-1,t}^{\lambda\rho} = \delta_{t-1}) \\ & = \mathbb{E}_\pi \left[ \sum_{j=k}^{t-1} \left( \prod_{i=k+1}^j \gamma_i \lambda_i \right) (\delta_j + \boldsymbol{\theta}^\top (\boldsymbol{\phi}_j - \bar{\boldsymbol{\phi}}_j^\pi) - \boldsymbol{\theta}^\top (\boldsymbol{\phi}_k - \bar{\boldsymbol{\phi}}_k^\pi) \middle| S_k = s, A_k = a \right). \end{aligned}$$

It thus only remains to show that  $\delta_{k,t}^{\lambda 1}$  is equal to the quantity whose expectation is being taken here:

$$\begin{aligned} \delta_{k,t}^{\lambda 1} & = \delta_k + \gamma_{k+1} \lambda_{k+1} \boldsymbol{\theta}^\top (\boldsymbol{\phi}_{k+1} - \bar{\boldsymbol{\phi}}_{k+1}^\pi) + \gamma_{k+1} \lambda_{k+1} \delta_{k+1,t}^{\lambda\rho} \\ & = \delta_k + \gamma_{k+1} \lambda_{k+1} \delta_{k+1} + \gamma_{k+1} \lambda_{k+1} \boldsymbol{\theta}^\top (\boldsymbol{\phi}_{k+1} - \bar{\boldsymbol{\phi}}_{k+1}^\pi) + \gamma_{k+1} \lambda_{k+1} \gamma_{k+2} \lambda_{k+2} \boldsymbol{\theta}^\top (\boldsymbol{\phi}_{k+1} - \bar{\boldsymbol{\phi}}_{k+1}^\pi) + \gamma_{k+2} \lambda_{k+2} \delta_{k+2,t}^{\lambda\rho} \\ & \vdots \\ & = \sum_{j=k}^{t-1} \left( \prod_{i=k+1}^j \gamma_i \lambda_i \right) (\delta_j + \boldsymbol{\theta}^\top (\boldsymbol{\phi}_j - \bar{\boldsymbol{\phi}}_j^\pi) - \boldsymbol{\theta}^\top (\boldsymbol{\phi}_k - \bar{\boldsymbol{\phi}}_k^\pi)). \end{aligned}$$

The last term is there because  $\delta_{t-1,t}^{\lambda 1} = \delta_{t-1}$ , so in the summation the indices of the  $\delta$  range from  $k$  to  $t-1$ , but the indices on the other terms range from  $k+1$  to  $t$ .  $\square$

## S.7 Additional detail on the provisional-weight updates (15) and (27)

A key step in the derivation of (15) is the transition from the second to the third equation, involving a re-writing of  $\bar{\delta}_k^t$  in terms of  $\bar{\delta}_k^{t-1}$ . Here we spell it out more fully:

$$\begin{aligned} \bar{\delta}_k^t & = R_{k+1} + \cdots + R_{t-1} + R_t + \boldsymbol{\theta}^\top \boldsymbol{\phi}_t - \boldsymbol{\theta}^\top \boldsymbol{\phi}_k && \text{(from (4))} \\ & = R_{k+1} + \cdots + R_{t-1} + R_t + \boldsymbol{\theta}^\top \boldsymbol{\phi}_t - \boldsymbol{\theta}^\top \boldsymbol{\phi}_k + \boldsymbol{\theta}^\top \boldsymbol{\phi}_{t-1} - \boldsymbol{\theta}^\top \boldsymbol{\phi}_{t-1} \\ & = \underbrace{R_{k+1} + \cdots + R_{t-1} + \boldsymbol{\theta}^\top \boldsymbol{\phi}_{t-1} - \boldsymbol{\theta}^\top \boldsymbol{\phi}_k}_{\bar{\delta}_k^{t-1}} + \underbrace{R_t + \boldsymbol{\theta}^\top \boldsymbol{\phi}_t - \boldsymbol{\theta}^\top \boldsymbol{\phi}_{t-1}}_{\bar{\delta}_{t-1}^t} && \text{(regrouping)} \\ & = \bar{\delta}_k^{t-1} + \bar{\delta}_{t-1}^t. \end{aligned}$$

The derivation for PQ's provisional weight update (27) is similar to that for PTD, but was not included in the main text to save space. We include it here:

$$\begin{aligned} \mathbf{u}_t & = \alpha \gamma_t \lambda_t \sum_{k=0}^{t-1} C_k^{t-1} \bar{\delta}_k^t \boldsymbol{\phi}_k \\ & = \alpha \gamma_t \lambda_t \left[ \sum_{k=0}^{t-2} C_k^{t-1} \bar{\delta}_k^t \boldsymbol{\phi}_k + C_{t-1}^{t-1} \bar{\delta}_{t-1}^t \boldsymbol{\phi}_{t-1} \right] \\ & = \alpha \gamma_t \lambda_t \left[ \sum_{k=0}^{t-2} C_k^{t-1} \left[ \bar{\delta}_k^{t-1} + \bar{\delta}_{t-1}^t + \boldsymbol{\theta}^\top (\boldsymbol{\phi}_{t-1} - \bar{\boldsymbol{\phi}}_{t-1}^\pi) \right] \boldsymbol{\phi}_k + \bar{\delta}_{t-1}^t \boldsymbol{\phi}_{t-1} \right] \\ & = \gamma_t \lambda_t \left( \rho_{t-1} \mathbf{u}_{t-1} + \alpha \bar{\delta}_{t-1}^t \mathbf{e}_{t-1} + \alpha \boldsymbol{\theta}^\top (\boldsymbol{\phi}_{t-1} - \bar{\boldsymbol{\phi}}_{t-1}^\pi) (\mathbf{e}_{t-1} - \boldsymbol{\phi}_{t-1}) \right). \end{aligned} \quad (27)$$

As in the PTD derivation, the key step is moving from the second to the third equation by writing  $\bar{\delta}_k^t$  in terms of  $\bar{\delta}_k^{t-1}$ , as follows:

$$\begin{aligned} \bar{\delta}_k^t & = R_{k+1} + \cdots + R_{t-1} + R_t + \boldsymbol{\theta}^\top \bar{\boldsymbol{\phi}}_t^\pi - \boldsymbol{\theta}^\top \boldsymbol{\phi}_k && \text{(from (21))} \\ & = R_{k+1} + \cdots + R_{t-1} + R_t + \boldsymbol{\theta}^\top \bar{\boldsymbol{\phi}}_t^\pi - \boldsymbol{\theta}^\top \boldsymbol{\phi}_k + \boldsymbol{\theta}^\top \bar{\boldsymbol{\phi}}_{t-1}^\pi - \boldsymbol{\theta}^\top \bar{\boldsymbol{\phi}}_{t-1}^\pi + \boldsymbol{\theta}^\top \boldsymbol{\phi}_{t-1} - \boldsymbol{\theta}^\top \boldsymbol{\phi}_{t-1} \\ & = (R_{k+1} + \cdots + R_{t-1} + \boldsymbol{\theta}^\top \bar{\boldsymbol{\phi}}_{t-1}^\pi - \boldsymbol{\theta}^\top \boldsymbol{\phi}_k) + (R_t + \boldsymbol{\theta}^\top \bar{\boldsymbol{\phi}}_t^\pi - \boldsymbol{\theta}^\top \boldsymbol{\phi}_{t-1}) - \boldsymbol{\theta}^\top \bar{\boldsymbol{\phi}}_{t-1}^\pi + \boldsymbol{\theta}^\top \boldsymbol{\phi}_{t-1} && \text{(regrouping)} \\ & = \bar{\delta}_k^{t-1} + \bar{\delta}_{t-1}^t + \boldsymbol{\theta}^\top (\boldsymbol{\phi}_{t-1} - \bar{\boldsymbol{\phi}}_{t-1}^\pi). \end{aligned}$$
